# Supplementary material
Source: PubMed Central journal article supplement (PMC3797225)
Supplement: NIHMS495089-supplement-Supp_Figure_S1-S7_Table_S1-S3.pdf [file NIHMS495089-supplement-Supp_Figure_S1-S7_Table_S1-S3.pdf]

**Fig. S1**

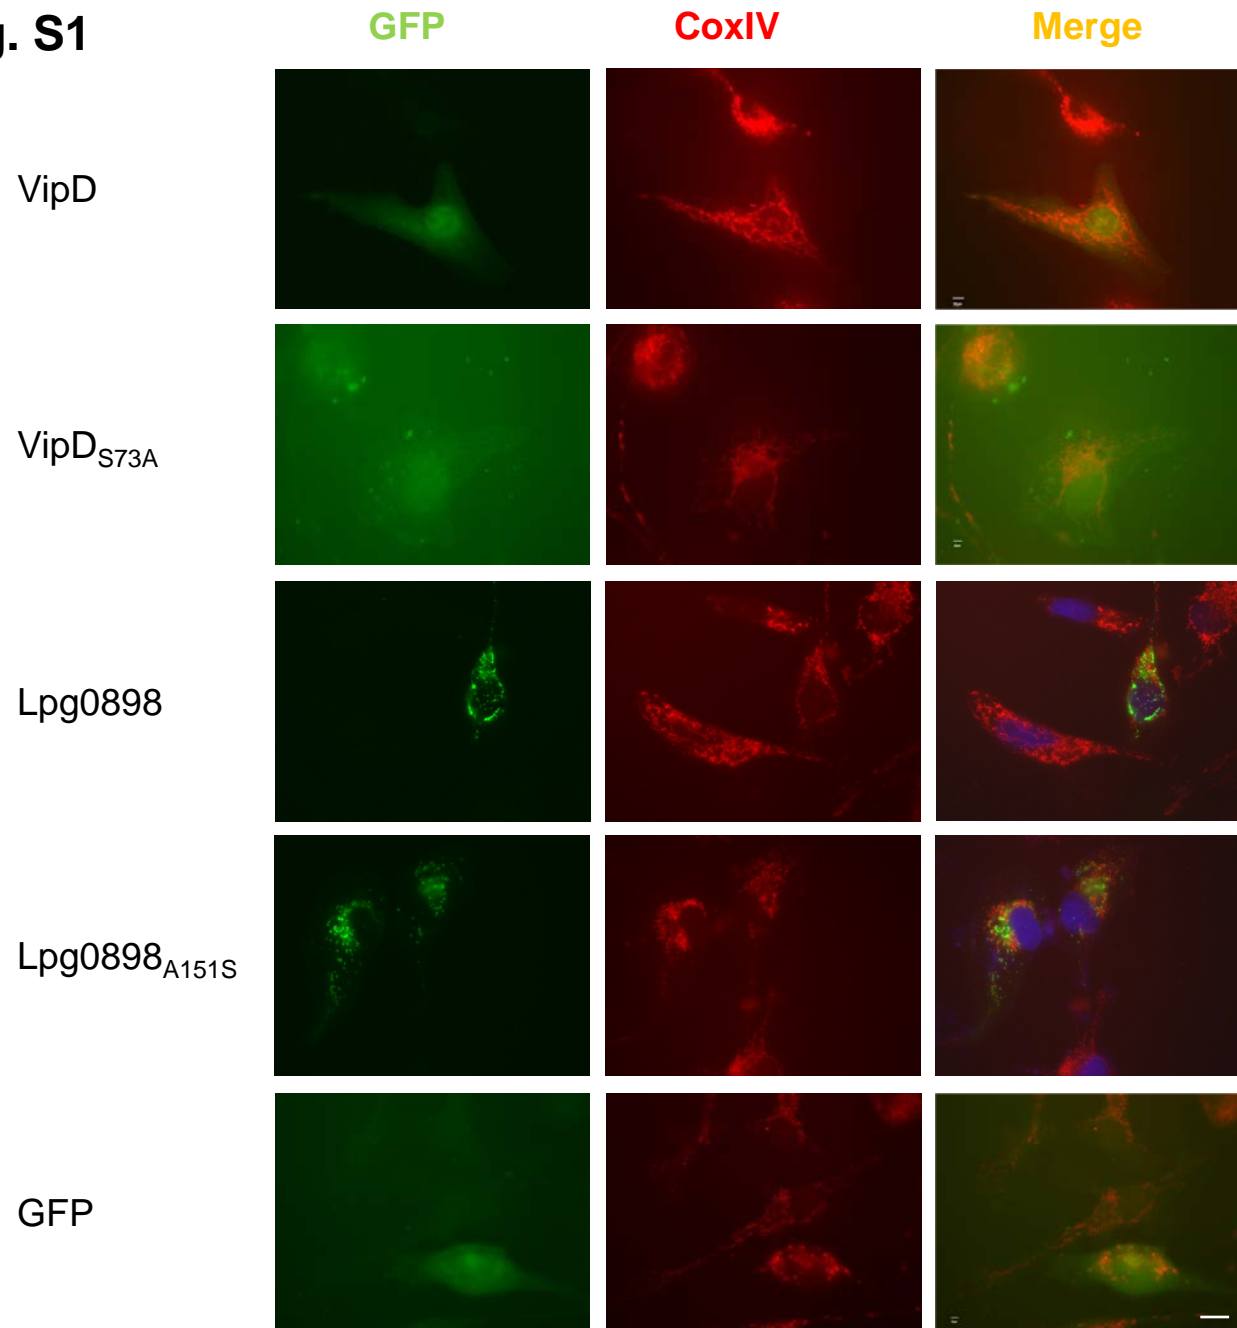

**Fig. S2**

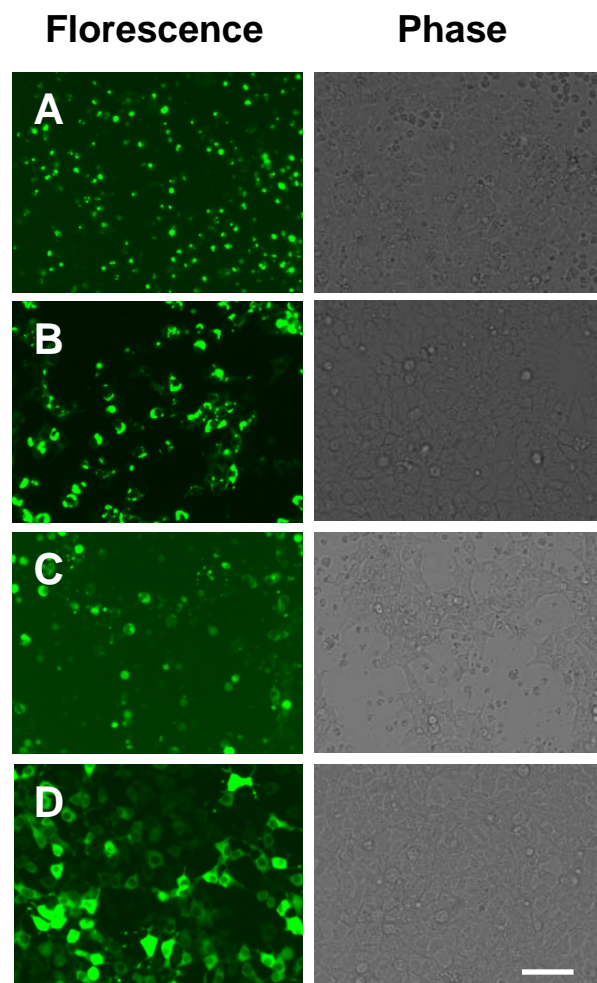

Fig. S3

A

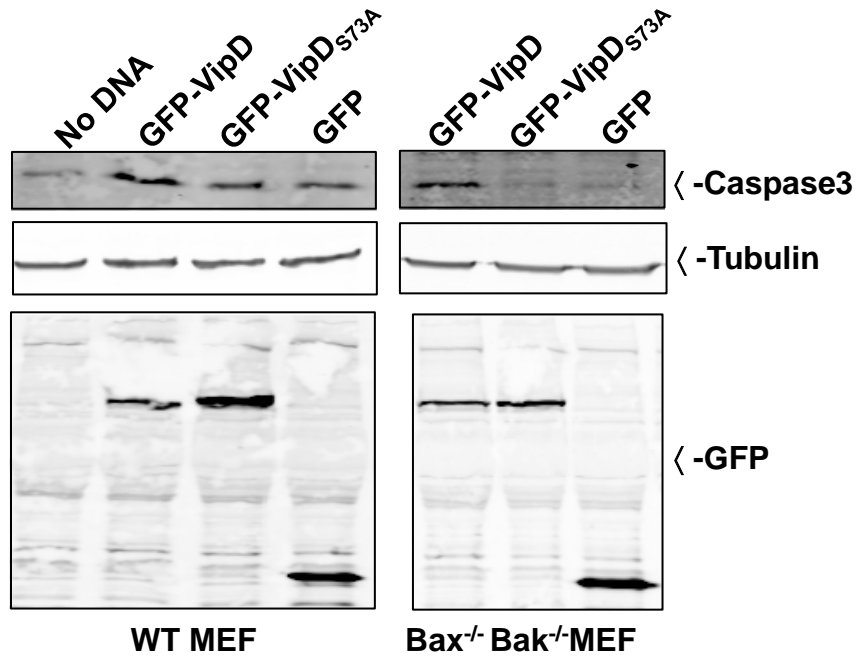

B

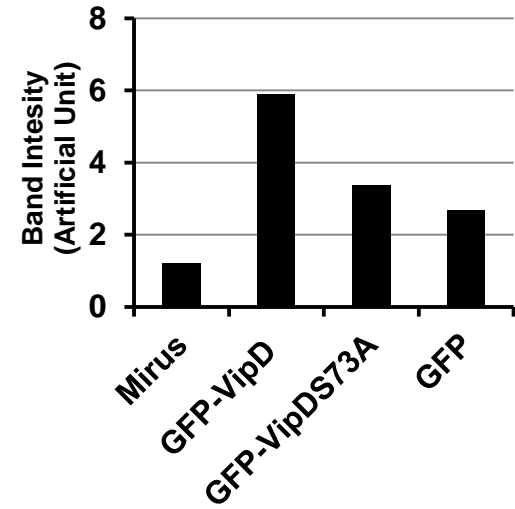

C

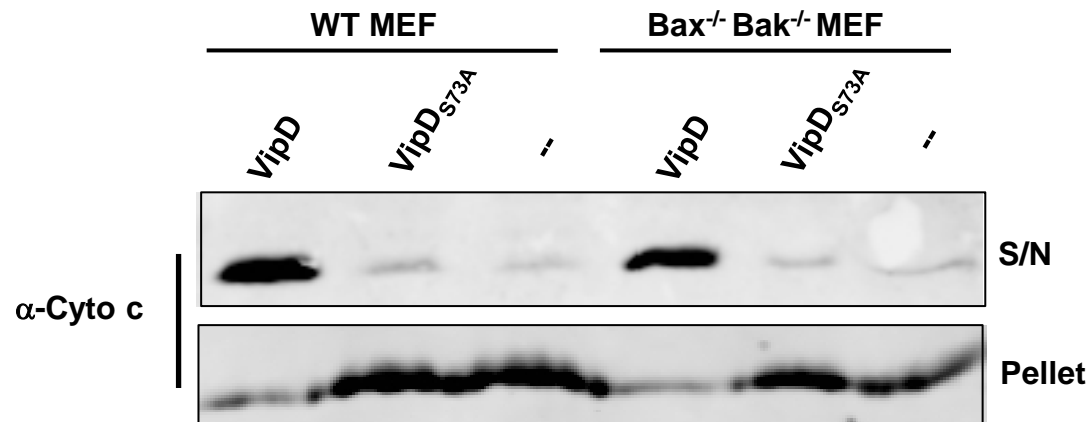

**Fig. S4**

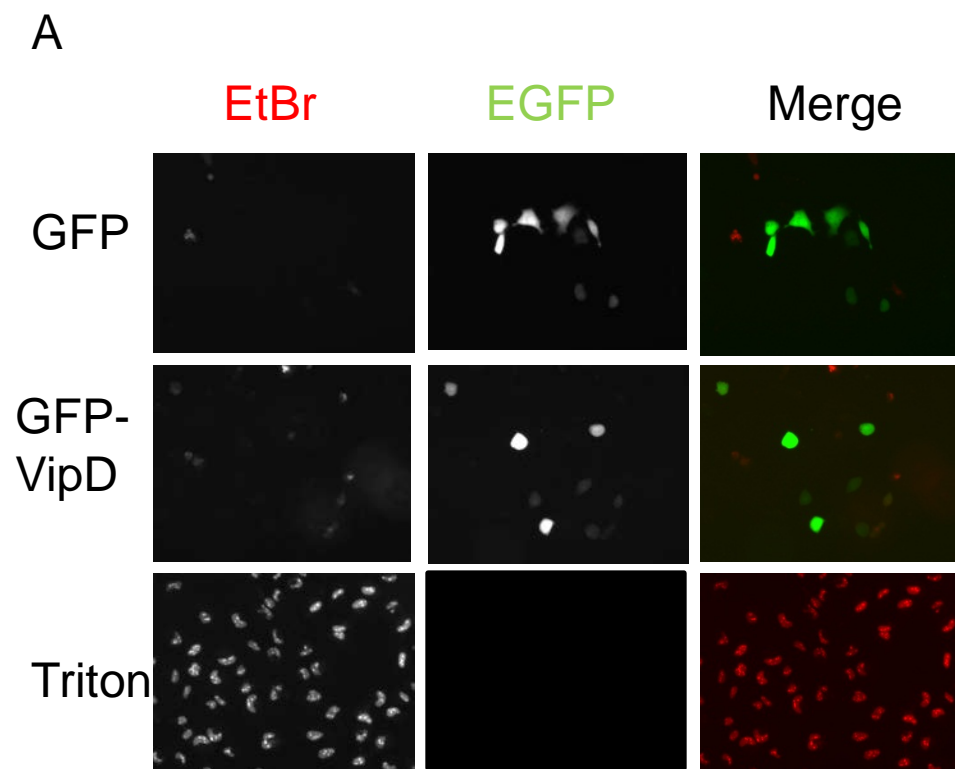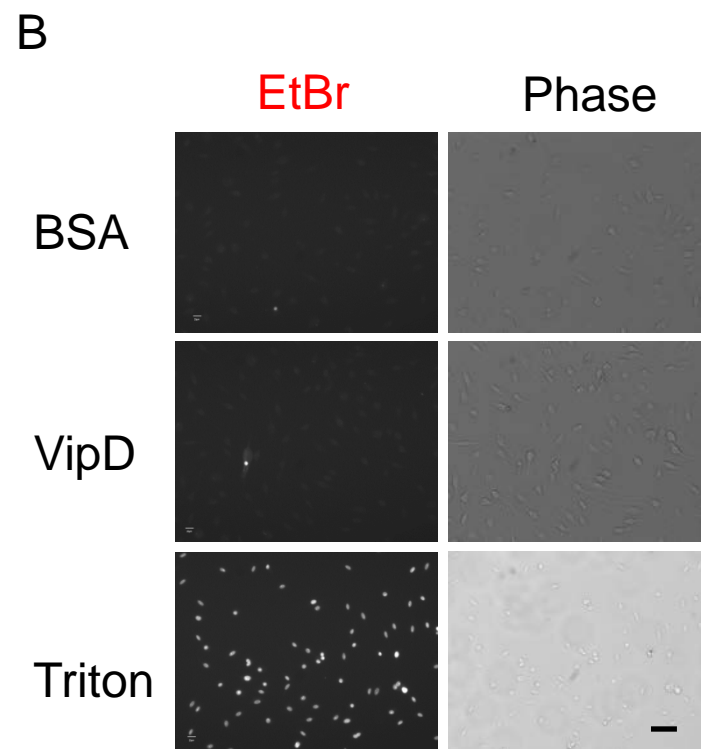

**Fig. S5**

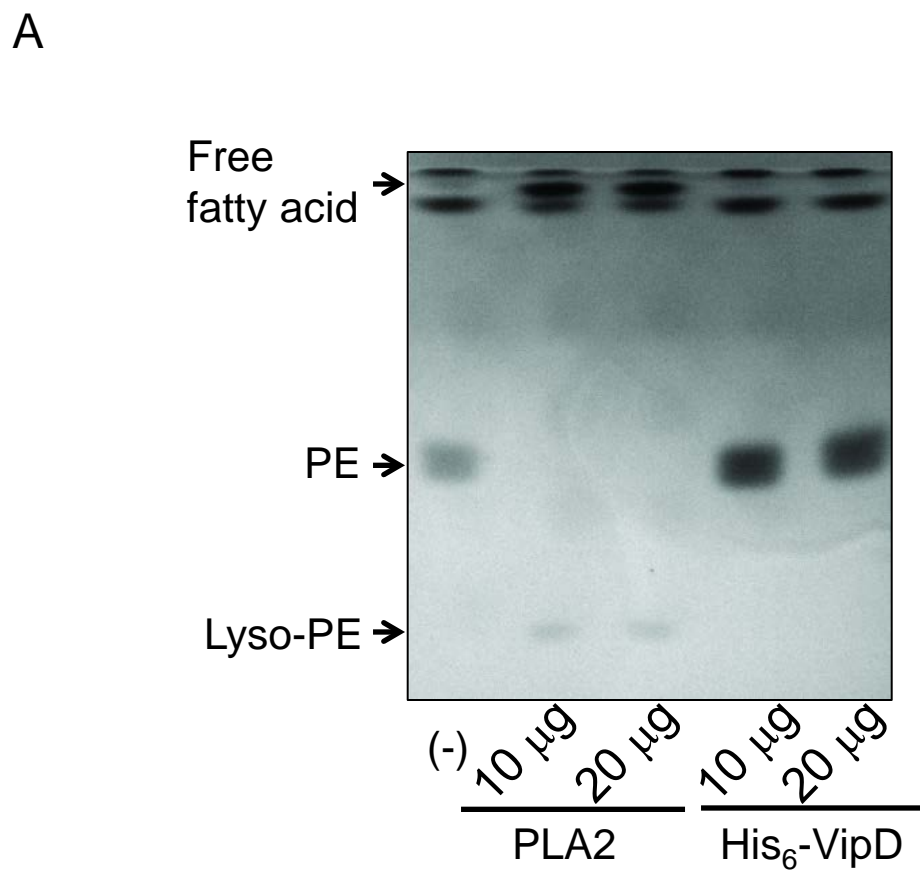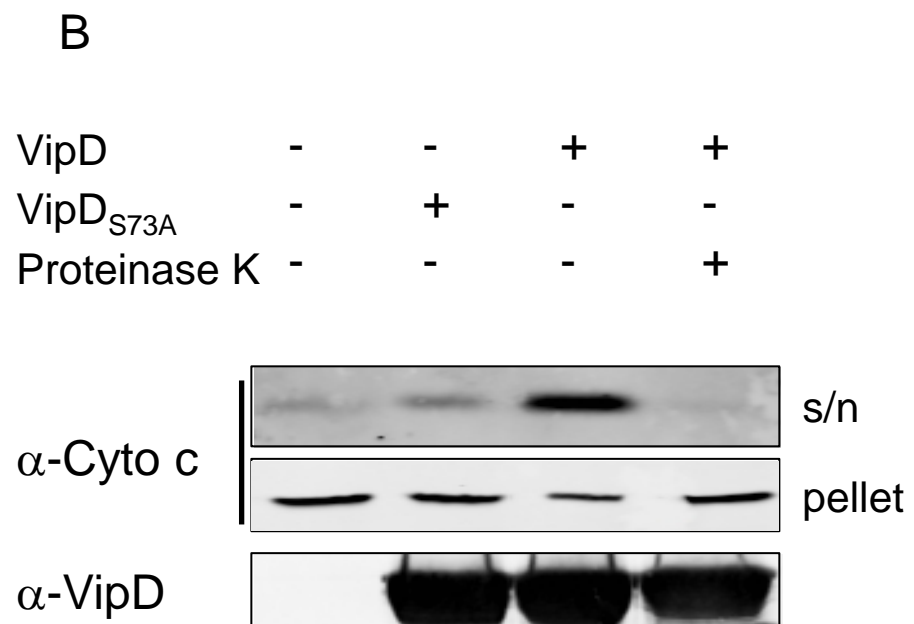

Fig. S6

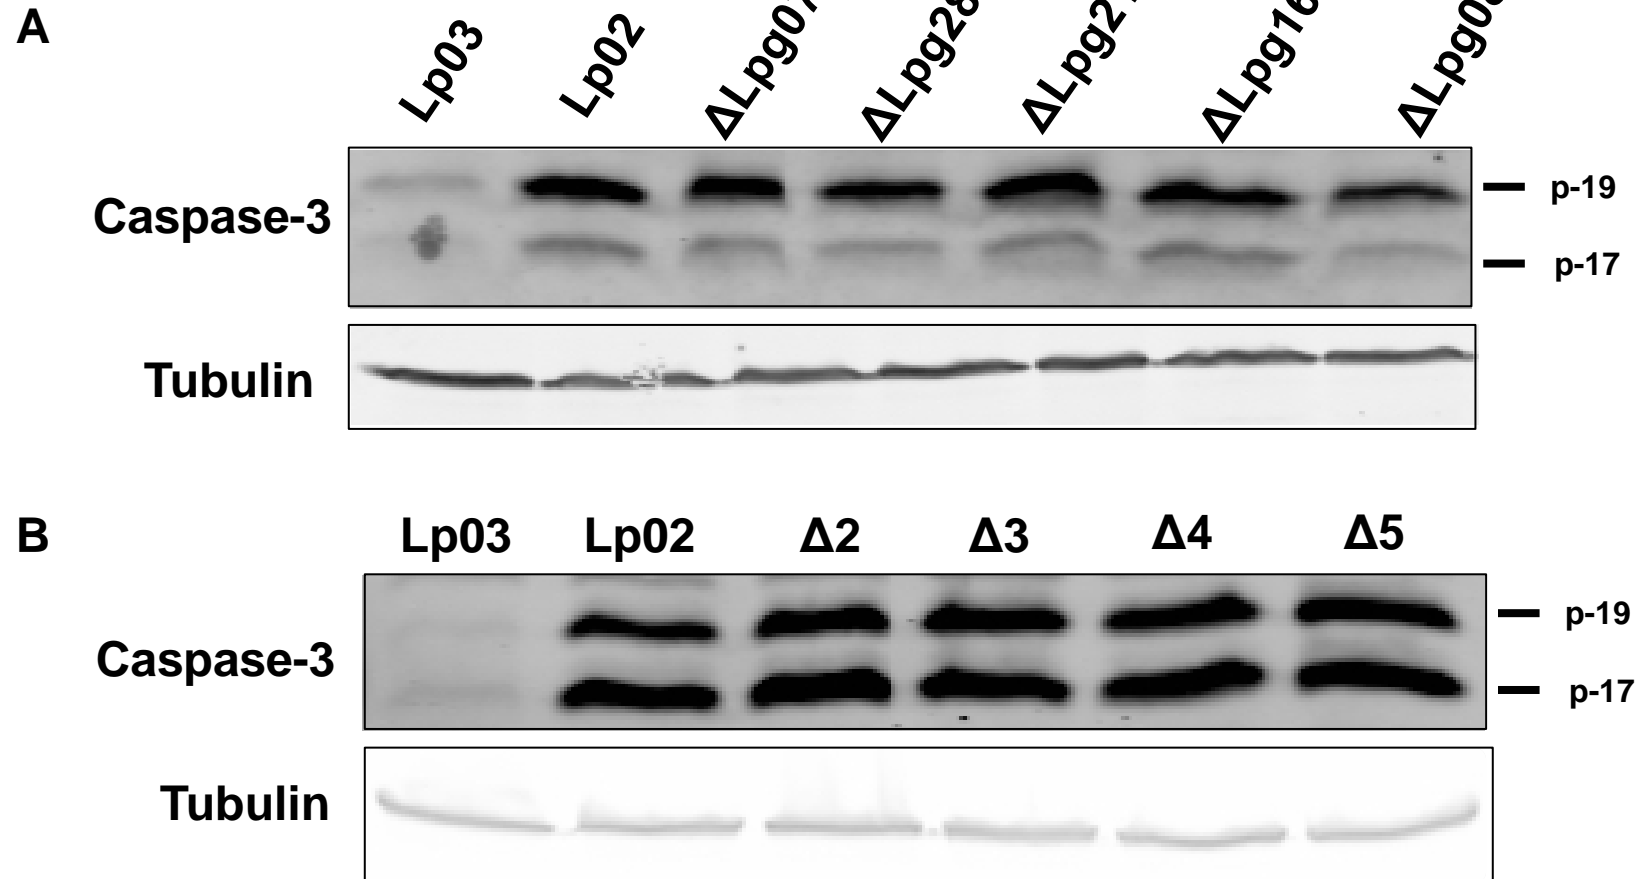

Fig. S7

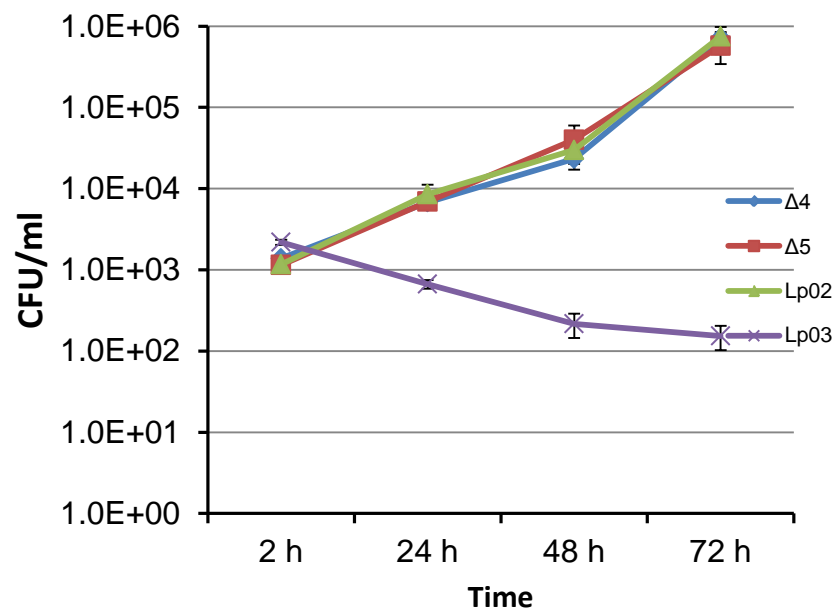

Table S1 Bacterial and yeast strains used in this study

| Strains               | Genotype, relevant markers                                                                                    | Reference                       |
|-----------------------|---------------------------------------------------------------------------------------------------------------|---------------------------------|
| <i>E. coli</i>        |                                                                                                               |                                 |
| XL1-Blue              | <i>recA1 endA1 gyrA96 thi-1 hsdR17 supE44 relA1 lac [F' proAB lacI<sup>q</sup>ZM15 Tn10(Tet<sup>r</sup>)]</i> | Stratagene<br>Our<br>collection |
| DH5α(λpir)            | <i>supE44 dlacU169(φ80lacZΔM15) hsdR17 recA1 endA1 gyrA96 thi-1 relA1 pir tet::Mu recA</i>                    |                                 |
| <i>L. pneumophila</i> |                                                                                                               |                                 |
| Lp02                  | Philadelphia-1 <i>rpsL hsdR thyA</i>                                                                          | (1)                             |
| Δ 1(pJB908)           | LP02Δ <i>lpg0898</i> (pJB908)                                                                                 | This study                      |
| Δ 2(pJB908)           | LP02Δ <i>lpg0898</i> , Δ <i>lpg1625</i> (pJB908)                                                              | This study                      |
| Δ 3(pJB908)           | LP02Δ <i>lpg0898</i> , Δ <i>lpg1625</i> , Δ <i>lpg1803</i> (pJB908)                                           | This study                      |
| Δ 4(pJB908)           | LP02Δ <i>lpg0898</i> , Δ <i>lpg1625</i> , Δ <i>lpg1803</i> , Δ <i>lpg2831</i><br>(pJB908)                     | (2)                             |
| Δ 5(pJB908)           | LP02Δ <i>lpg0898</i> , Δ <i>lpg1625</i> , Δ <i>lpg1803</i> , Δ <i>lpg2831</i> , Δ<br><i>lpg2176</i> (pJB908)  | This study                      |
| ΔVipD(pJB908)         | Lp02Δ <i>vipD</i> (pJB908)                                                                                    | This study                      |
| ΔVipDfam<br>(pJB908)  | Lp02Δ <i>vipD</i> , Δ <i>vpdA</i> , Δ <i>vpdB</i> , Δ <i>vpdC</i> (pJB908)                                    | This study                      |
| ZL14                  | Lp03(pJB908)                                                                                                  | (3)                             |
| Lp03                  | Lp02( <i>dotA</i> <sup>-</sup> )                                                                              | (1)                             |
| Lp02(pJB908)          | Lp02(pJB908)                                                                                                  | (3)                             |
| Δ7                    | Chromosomal deletion strain                                                                                   |                                 |

## Reference:

- Berger, K. H., and Isberg, R. R. (1993) *Mol Microbiol* **7**, 7-19
- VanRheenen, S. M., Luo, Z. Q., O'Connor, T., and Isberg, R. R. (2006) *Infect Immun* **74**, 3597-3606
- Liu, Y., and Luo, Z. Q. (2007) *Infect Immun* **75**, 592-603



Table S2 Primers used in this study

| Primer               | Sequence (Restriction enzyme sites are underlined) | Note                                  |
|----------------------|----------------------------------------------------|---------------------------------------|
| VipD250              | ctgggatccTAAATGATGCAATATTTTAC                      | VipD plus promoter                    |
| VipD1                | ctgggatccATGAAACTTGCTGAAATTAT                      | VipD 5' BamHI                         |
| VipD2                | ctggtcgacTTAATGGCCGCCAAATGTGG                      | VipD 3' Sall                          |
| VipD $\Delta$ F      | GGGTTTACGGCTTTGTGGGT                               | VipD deletion verification primer F   |
| VipD $\Delta$ R      | TTGGATTGCGTATTTGAAC                                | VipD deletion verification primer R   |
| lpg1625 up F SacI    | ctggagctcAATTTTGAAGCGCCAACCGG                      | lpg1625 deletion upstream primer 5'   |
| lpg1625 up R BamHI   | ctgggatccCTTATCTGATTGAATGAGTT                      | lpg1625 deletion upstream primer 3'   |
| lpg1625 down F BamHI | ctgggatccGCAGCCGCTGCAACAGTAGG                      | lpg1625 deletion downstream primer 5' |
| lpg1625 down R NotI  | ctggcggccgcTAAACAGTTCATTTAGACCC                    | lpg1625 deletion downstream primer 3' |
| lpg0716 up F NotI    | ctggcggccgcAGTAGAAAACCAGAGTCCAA                    | lpg0716 deletion upstream primer 5'   |
| lpg0716 up R BamHI   | ctgggatccTGCTGTACCTGACTCGTTTT                      | lpg0716 deletion upstream primer 3'   |
| lpg0716 down F BamHI | ctgggatccTCCGTATCCCCCACTATTCA                      | lpg0716 deletion downstream primer 5' |
| lpg0716 down R Sall  | ctggtcgacAAGATGGATCAGTCATGGGC                      | lpg0716 deletion downstream primer 3' |
| lpg2176 up F NotI    | ctggcggccgcCTCTGGCAAGGATAGTTCCT                    | lpg2176 deletion upstream primer 5'   |
| lpg2176 up R BamHI   | ctgggatccTAAATCTGAAACAAACCCGA                      | lpg2176 deletion upstream primer 3'   |

|                      |                                          |                                       |
|----------------------|------------------------------------------|---------------------------------------|
| lpg2176 down F BamHI | <u>ctgggatcc</u> GATGAAGGACTTAGAAATAG    | lpg2176 deletion downstream primer 5' |
| lpg2176 down R SalI  | ctggtc <u>cgac</u> GGATTCGAACCTATGACCCT  | lpg2176 deletion downstream primer 3' |
| lpg1803 up F SacI    | ctggag <u>ctc</u> TGTGGTGAGGGCTCGAAGCC   | lpg1803 deletion upstream primer 5'   |
| lpg1803 up R NotI    | ctggcggcc <u>gc</u> AATCAGATCACATAAAAACT | lpg1803 deletion upstream primer 3'   |
| lpg1803 down F NotI  | ctggcggcc <u>gc</u> TTTGTGCCAGATTGCTTAC  | lpg1803 deletion downstream primer 5' |
| lpg1803 down R SalI  | ctggtc <u>cgac</u> TTTTTAATTGAACCAATACG  | lpg1803 deletion downstream primer 3' |
| lpg0898 up F SalI    | ctggtc <u>cgac</u> CACAACACAGCAAAAATA    | lpg0898 deletion upstream 5'          |
| lpg0898 up R BamHI   | ctgggatccAGCAGATAATATTGACAT              | lpg0898 deletion upstream 3'          |
| lpg0898 down R BamHI | ctgggatccTCATTGGCTATTCATTAA              | lpg0898 deletion downstream 5'        |
| lpg0898 down R NotI  | ctggcggcc <u>gc</u> CCAATTATCGTACCTATC   | lpg0898 deletion downstream 3'        |
| VipD S73A F          | CATGTTAGCGGAGCAGCTGCCGGAGCAATGA          |                                       |
| VipD S73A R          | GTACAATCGCCTCGTCGACGGCCTCGTTACT          |                                       |
| VipD D288A F         | GGGTGAATACATCGCTGCTGGAGGAATTCTGGACA      |                                       |
| VipD D288A R         | CCCCTTATGTAGCGACGACCTCCTTAAGACCTGT       |                                       |

Table S3 Plasmids used in this study

| Plasmid                      | Relevant phenotypes                                                   | Sources    |
|------------------------------|-----------------------------------------------------------------------|------------|
| pQE30                        | Amp                                                                   | Qiagen     |
| pJB908                       | Amp, <i>thy</i> <sup>+</sup>                                          | (1)        |
| pEGFPC-1                     | For expressing C-terminal GFP fusion proteins                         | Clontech   |
| pSR47S $\Delta$ 898          | Kan, for deleting <i>lpg0898</i> in <i>L.pneumophila</i> genome       | This study |
| pSR47S $\Delta$ 1625         | Kan, for deleting <i>lpg1625</i> in <i>L.pneumophila</i> genome       | This study |
| pSR47S $\Delta$ <i>vipd</i>  | Kan, for deleting <i>vipd</i> in <i>L.pneumophila</i> genome          | This study |
| pSR47S $\Delta$ 0716         | Kan, for deleting <i>lpg0716</i> in <i>L.pneumophila</i> genome       | This study |
| pSR47S $\Delta$ 2176         | Kan, for deleting <i>lpg2176</i> in <i>L.pneumophila</i> genome       | This study |
| pSR47S $\Delta$ 1803         | Kan, for deleting <i>lpg1803</i> in <i>L.pneumophila</i> genome       | This study |
| pETSUMO: <i>vipd</i>         | Kan, for expression and purification of <i>vipd</i> , BamHI, Sall     | This study |
| pETSUMO: <i>vipd</i><br>S73A | Kan, for expression and purification of <i>vipd</i> S73A, BamHI, Sall | This study |
| pEGFP898                     | pEGFPc1:: <i>lpg0898</i> , BamHI, Sall                                | This study |
| pEGFP1625                    | pEGFPc1:: <i>lpg1625</i> , BamHI, Sall                                | This study |
| pEGFP0716                    | pEGFPc1:: <i>lpg0716</i> , BamHI, Sall                                | This study |
| pEGFP2176                    | pEGFPc1:: <i>lpg2176</i> , BamHI, Sall                                | This study |
| pEGFP1803                    | pEGFPc1:: <i>lpg1803</i> , BamHI, Sall                                | This study |
| pEGFPVipD                    | pEGFPc1::VipD, BamHI, Sall                                            | This study |
| pEGFPVipDS73A                | pEGFPc1::VipD <sub>S73A</sub> , BamHI, Sall                           | This study |

## Referecne

1. Bardill, J. P., Miller, J. L., and Vogel, J. P. (2005) *Mol Microbiol* **56**, 90-103
